# Supplementary material
Source: publisher figshare collection journal article supplement (https://acs.figshare.com/ndownloader/files/5193241)
Supplement: Supplementary file 1 [file 5193241]

data_compound18
 
_audit_creation_method            SHELXL-97
_chemical_name_systematic
;
di(tert-butyl)
(2S,4S)-4-[(4-nitrobenzoyl)oxy]-1,2-piperidinedicarboxylate
;
_chemical_name_common             
;
trans-4-hydroxy-pipecolate derivative
;

_chemical_formula_sum
 'C22 H30 N2 O8'
_chemical_formula_weight          450.48
 
 
_symmetry_cell_setting            orthorhombic
_symmetry_space_group_name_H-M    'P 21 21 21'
 
loop_
 _symmetry_equiv_pos_as_xyz
 'x, y, z'
 '-x+1/2, -y, z+1/2'
 'x+1/2, -y+1/2, -z'
 '-x, y+1/2, -z+1/2'
 
_cell_length_a                    6.2400(2)
_cell_length_b                    13.5460(4)
_cell_length_c                    29.7090(9)
_cell_angle_alpha                 90.00
_cell_angle_beta                  90.00
_cell_angle_gamma                 90.00
_cell_volume                      2511.21(13)
_cell_formula_units_Z             4
_cell_measurement_temperature     293(2)
 
_exptl_crystal_description        'prismatic' 
_exptl_crystal_colour             'colorless'
_exptl_crystal_size_max           .3 
_exptl_crystal_size_mid           .2
_exptl_crystal_size_min           .2
_exptl_crystal_density_diffrn     1.192
_exptl_crystal_density_method     'not measured'
_exptl_crystal_F_000              960
_exptl_absorpt_coefficient_mu     0.091
_exptl_absorpt_correction_type    'none'
_exptl_absorpt_correction_T_min   ?
_exptl_absorpt_correction_T_max   ?
 
_diffrn_ambient_temperature       293(2) 
_diffrn_radiation_wavelength      0.71070 
_diffrn_radiation_type            MoK\a 
_diffrn_radiation_source          'fine-focus sealed tube' 
_diffrn_radiation_monochromator   graphite 
_diffrn_measurement_device_type   'Kappa CCD Nonius B.V.' 
_diffrn_measurement_method        'oscillation' 
_diffrn_reflns_number             12450
_diffrn_reflns_av_R_equivalents   0.0440
_diffrn_reflns_av_sigmaI/netI     0.0303
_diffrn_reflns_limit_h_min        -6
_diffrn_reflns_limit_h_max        6
_diffrn_reflns_limit_k_min        -15
_diffrn_reflns_limit_k_max        15
_diffrn_reflns_limit_l_min        -32
_diffrn_reflns_limit_l_max        32
_diffrn_reflns_theta_min          3.64
_diffrn_reflns_theta_max          23.27
_reflns_number_total              2091
_reflns_number_gt                 1646
_reflns_threshold_expression      >2sigma(I)
 
_computing_data_collection        'COLLECT software (Nonius, 1998)' 
_computing_cell_refinement        'COLLECT software (Nonius, 1998)' 
_computing_data_reduction         'HKL Suite (Otwinoski & Minor, 1997)' 
_computing_structure_solution     'SIR_92 (Altomare et al., 1994)' 
_computing_structure_refinement         'SHELXL-97 (Sheldrick, 1997)'
_computing_molecular_graphics           
'Ortep-3 for Windows (Farrugia, 1997)'
 
_refine_special_details
;
 Refinement of F^2^ against ALL reflections.  The weighted R-factor wR and
 goodness of fit S are based on F^2^, conventional R-factors R are based
 on F, with F set to zero for negative F^2^. The threshold expression of
 F^2^ > 2sigma(F^2^) is used only for calculating R-factors(gt) etc. and is
 not relevant to the choice of reflections for refinement.  R-factors based
 on F^2^ are statistically about twice as large as those based on F, and R-
 factors based on ALL data will be even larger.
;
 
_refine_ls_structure_factor_coef  Fsqd
_refine_ls_matrix_type            full
_refine_ls_weighting_scheme       calc
_refine_ls_weighting_details
 'calc w=1/[\s^2^(Fo^2^)+(0.0783P)^2^+0.0000P] where P=(Fo^2^+2Fc^2^)/3'
_atom_sites_solution_primary      direct
_atom_sites_solution_secondary    difmap
_atom_sites_solution_hydrogens    geom
_refine_ls_hydrogen_treatment     mixed
_refine_ls_extinction_method      none
_refine_ls_number_reflns          2091
_refine_ls_number_parameters      289
_refine_ls_number_restraints      0
_refine_ls_R_factor_all           0.0583
_refine_ls_R_factor_gt            0.0405
_refine_ls_wR_factor_ref          0.1084
_refine_ls_wR_factor_gt           0.0992
_refine_ls_goodness_of_fit_ref    0.995
_refine_ls_restrained_S_all       0.995
_refine_ls_shift/su_max           0.000
_refine_ls_shift/su_mean          0.000
 
loop_
 _atom_site_label
 _atom_site_type_symbol
 _atom_site_fract_x
 _atom_site_fract_y
 _atom_site_fract_z
 _atom_site_U_iso_or_equiv
 _atom_site_adp_type
 _atom_site_occupancy
 _atom_site_symmetry_multiplicity
 _atom_site_calc_flag
 _atom_site_refinement_flags
 _atom_site_disorder_assembly
 _atom_site_disorder_group
O3 O 0.2131(3) 0.80848(15) 0.66401(7) 0.0596(6) Uani 1 1 d . . .
O4 O 0.2094(4) 0.77797(17) 0.58947(7) 0.0732(7) Uani 1 1 d . . .
O8 O -0.3376(4) 1.19016(15) 0.65735(6) 0.0633(6) Uani 1 1 d . . .
O7 O -0.4989(4) 1.11686(17) 0.71724(7) 0.0737(7) Uani 1 1 d . . .
O1 O -0.1559(4) 1.0303(2) 0.55963(6) 0.0795(8) Uani 1 1 d . . .
N1 N -0.2258(4) 1.04174(18) 0.67942(7) 0.0482(6) Uani 1 1 d . . .
O2 O -0.4187(4) 0.9700(2) 0.60189(8) 0.0956(10) Uani 1 1 d . . .
O6 O 1.1431(5) 0.5125(2) 0.62197(10) 0.1041(10) Uani 1 1 d . . .
C7 C 0.0884(5) 0.9711(2) 0.64070(10) 0.0524(8) Uani 1 1 d . . .
H7A H 0.1516 0.9626 0.6111 0.063 Uiso 1 1 calc R . .
H7B H 0.1950 1.0011 0.6601 0.063 Uiso 1 1 calc R . .
C12 C 0.4843(5) 0.7068(2) 0.63504(10) 0.0514(8) Uani 1 1 d . . .
N2 N 1.0387(5) 0.5353(2) 0.65470(12) 0.0739(8) Uani 1 1 d . . .
C13 C 0.5396(5) 0.6760(2) 0.67760(10) 0.0594(9) Uani 1 1 d . . .
H13 H 0.4543 0.6936 0.7020 0.071 Uiso 1 1 calc R . .
C15 C 0.8426(5) 0.5959(2) 0.64812(11) 0.0576(8) Uani 1 1 d . . .
C17 C 0.6117(6) 0.6807(3) 0.59855(11) 0.0639(9) Uani 1 1 d . . .
H17 H 0.5739 0.7010 0.5697 0.077 Uiso 1 1 calc R . .
C11 C 0.2884(5) 0.7677(2) 0.62627(12) 0.0585(8) Uani 1 1 d . . .
O5 O 1.0867(5) 0.5128(3) 0.69269(11) 0.1152(11) Uani 1 1 d . . .
C18 C -0.3676(5) 1.1167(2) 0.68713(10) 0.0521(8) Uani 1 1 d . . .
C6 C -0.1073(4) 1.0390(2) 0.63726(8) 0.0462(7) Uani 1 1 d . . .
H6 H -0.0553 1.1059 0.6312 0.055 Uiso 1 1 calc R . .
C5 C -0.2498(6) 1.0087(3) 0.59812(9) 0.0553(8) Uani 1 1 d . . .
C10 C -0.2676(5) 0.9488(2) 0.70291(10) 0.0573(8) Uani 1 1 d . . .
H10A H -0.3795 0.9129 0.6872 0.069 Uiso 1 1 calc R . .
H10B H -0.3185 0.9629 0.7331 0.069 Uiso 1 1 calc R . .
C8 C 0.0252(5) 0.8721(2) 0.65936(10) 0.0519(8) Uani 1 1 d . . .
H8 H -0.0800 0.8407 0.6395 0.062 Uiso 1 1 calc R . .
C9 C -0.0693(5) 0.8850(2) 0.70572(9) 0.0597(9) Uani 1 1 d . . .
H9A H 0.0352 0.9159 0.7254 0.072 Uiso 1 1 calc R . .
H9B H -0.1060 0.8211 0.7182 0.072 Uiso 1 1 calc R . .
C16 C 0.7924(6) 0.6252(2) 0.60486(11) 0.0644(9) Uani 1 1 d . . .
H16 H 0.8791 0.6077 0.5807 0.077 Uiso 1 1 calc R . .
C14 C 0.7200(5) 0.6193(2) 0.68448(11) 0.0613(9) Uani 1 1 d . . .
H14 H 0.7570 0.5977 0.7132 0.074 Uiso 1 1 calc R . .
C19 C -0.4652(6) 1.2805(3) 0.65839(12) 0.0693(10) Uani 1 1 d . . .
C22 C -0.3762(8) 1.3377(3) 0.61913(13) 0.0946(13) Uani 1 1 d . . .
H22A H -0.4009 1.3016 0.5918 0.142 Uiso 1 1 calc R . .
H22B H -0.2250 1.3472 0.6232 0.142 Uiso 1 1 calc R . .
H22C H -0.4459 1.4008 0.6173 0.142 Uiso 1 1 calc R . .
C20 C -0.4277(10) 1.3360(3) 0.70124(13) 0.1098(16) Uani 1 1 d . . .
H20A H -0.4847 1.2990 0.7261 0.165 Uiso 1 1 calc R . .
H20B H -0.4976 1.3990 0.6997 0.165 Uiso 1 1 calc R . .
H20C H -0.2766 1.3455 0.7055 0.165 Uiso 1 1 calc R . .
C21 C -0.6999(7) 1.2563(4) 0.6509(2) 0.1267(19) Uani 1 1 d . . .
H21A H -0.7159 1.2210 0.6231 0.190 Uiso 1 1 calc R . .
H21B H -0.7814 1.3164 0.6497 0.190 Uiso 1 1 calc R . .
H21C H -0.7511 1.2162 0.6753 0.190 Uiso 1 1 calc R . .
C1 C -0.2512(7) 1.0031(4) 0.51534(11) 0.0958(15) Uani 1 1 d . . .
C3 C -0.2827(11) 0.8942(5) 0.51300(15) 0.147(2) Uani 1 1 d . . .
H3A H -0.1472 0.8617 0.5168 0.221 Uiso 1 1 calc R . .
H3B H -0.3423 0.8770 0.4843 0.221 Uiso 1 1 calc R . .
H3C H -0.3788 0.8739 0.5365 0.221 Uiso 1 1 calc R . .
C4 C -0.4588(11) 1.0610(6) 0.50995(16) 0.163(3) Uani 1 1 d . . .
H4A H -0.4293 1.1303 0.5122 0.244 Uiso 1 1 calc R . .
H4B H -0.5575 1.0421 0.5332 0.244 Uiso 1 1 calc R . .
H4C H -0.5206 1.0469 0.4811 0.244 Uiso 1 1 calc R . .
C2 C -0.0816(11) 1.0385(7) 0.48319(14) 0.206(4) Uani 1 1 d . . .
H2A H -0.0665 1.1088 0.4858 0.309 Uiso 1 1 calc R . .
H2B H -0.1224 1.0220 0.4530 0.309 Uiso 1 1 calc R . .
H2C H 0.0523 1.0073 0.4903 0.309 Uiso 1 1 calc R . .
 
loop_
 _atom_site_aniso_label
 _atom_site_aniso_U_11
 _atom_site_aniso_U_22
 _atom_site_aniso_U_33
 _atom_site_aniso_U_23
 _atom_site_aniso_U_13
 _atom_site_aniso_U_12
O3 0.0577(13) 0.0591(13) 0.0620(12) -0.0064(11) -0.0016(11) 0.0163(11)
O4 0.0738(16) 0.0797(16) 0.0660(14) -0.0176(12) -0.0115(13) 0.0190(14)
O8 0.0783(16) 0.0504(13) 0.0611(12) 0.0060(11) 0.0096(11) 0.0208(12)
O7 0.0832(17) 0.0676(16) 0.0703(14) -0.0007(12) 0.0294(14) 0.0185(14)
O1 0.0742(15) 0.117(2) 0.0476(12) 0.0060(13) 0.0034(12) -0.0153(16)
N1 0.0516(15) 0.0473(15) 0.0459(12) 0.0027(11) 0.0060(11) 0.0094(13)
O2 0.0556(17) 0.163(3) 0.0680(15) -0.0077(16) 0.0036(12) -0.0266(19)
O6 0.0912(19) 0.112(2) 0.109(2) 0.0036(18) 0.0244(18) 0.0465(18)
C7 0.0442(17) 0.0569(19) 0.0562(17) -0.0060(15) 0.0043(14) 0.0010(15)
C12 0.0539(18) 0.0374(17) 0.0627(19) -0.0058(15) 0.0023(17) 0.0029(15)
N2 0.067(2) 0.0619(19) 0.093(2) 0.0056(18) 0.0045(19) 0.0146(16)
C13 0.063(2) 0.055(2) 0.0597(19) -0.0022(17) 0.0077(16) 0.0076(17)
C15 0.0543(19) 0.0433(19) 0.075(2) -0.0039(16) 0.0022(17) 0.0080(15)
C17 0.068(2) 0.061(2) 0.0628(19) -0.0058(18) -0.0017(18) 0.016(2)
C11 0.057(2) 0.054(2) 0.064(2) -0.0114(17) -0.0027(18) 0.0015(17)
O5 0.102(2) 0.142(3) 0.102(2) 0.023(2) -0.0019(18) 0.056(2)
C18 0.0569(19) 0.0496(19) 0.0497(16) -0.0058(16) -0.0004(17) 0.0065(16)
C6 0.0460(17) 0.0466(17) 0.0460(15) -0.0023(14) 0.0049(13) 0.0030(15)
C5 0.046(2) 0.070(2) 0.0501(19) 0.0021(16) 0.0055(15) 0.0104(19)
C10 0.059(2) 0.056(2) 0.0573(17) 0.0036(16) 0.0108(15) 0.0062(18)
C8 0.0446(17) 0.0517(19) 0.0594(17) -0.0059(16) 0.0008(15) 0.0118(16)
C9 0.066(2) 0.0566(19) 0.0560(18) 0.0064(16) 0.0019(16) 0.0131(17)
C16 0.066(2) 0.062(2) 0.066(2) -0.0027(17) 0.0136(17) 0.009(2)
C14 0.065(2) 0.0567(19) 0.0617(19) 0.0022(16) 0.0032(18) 0.0127(18)
C19 0.076(2) 0.051(2) 0.081(2) 0.0007(19) -0.001(2) 0.017(2)
C22 0.124(4) 0.061(2) 0.099(3) 0.015(2) -0.005(3) 0.013(2)
C20 0.169(4) 0.068(3) 0.093(3) -0.024(2) 0.012(3) 0.004(3)
C21 0.074(3) 0.091(3) 0.215(6) 0.026(3) -0.029(3) 0.011(3)
C1 0.098(3) 0.144(5) 0.045(2) 0.006(2) -0.006(2) -0.016(3)
C3 0.200(6) 0.155(5) 0.087(3) -0.039(3) -0.025(4) 0.004(6)
C4 0.182(6) 0.204(7) 0.101(3) 0.008(4) -0.067(4) 0.056(6)
C2 0.201(7) 0.366(12) 0.050(2) 0.007(4) 0.009(3) -0.116(8)
 
_geom_special_details
;
 All esds (except the esd in the dihedral angle between two l.s. planes)
 are estimated using the full covariance matrix.  The cell esds are taken
 into account individually in the estimation of esds in distances, angles
 and torsion angles; correlations between esds in cell parameters are only
 used when they are defined by crystal symmetry.  An approximate (isotropic)
 treatment of cell esds is used for estimating esds involving l.s. planes.
;
 
loop_
 _geom_bond_atom_site_label_1
 _geom_bond_atom_site_label_2
 _geom_bond_distance
 _geom_bond_site_symmetry_2
 _geom_bond_publ_flag
O3 C11 1.336(4) . ?
O3 C8 1.461(3) . ?
O4 C11 1.208(4) . ?
O8 C18 1.345(4) . ?
O8 C19 1.461(4) . ?
O7 C18 1.213(3) . ?
O1 C5 1.318(3) . ?
O1 C1 1.490(4) . ?
N1 C18 1.366(4) . ?
N1 C6 1.455(3) . ?
N1 C10 1.463(4) . ?
O2 C5 1.182(4) . ?
O6 N2 1.210(4) . ?
C7 C8 1.504(4) . ?
C7 C6 1.533(4) . ?
C7 H7A 0.9700 . ?
C7 H7B 0.9700 . ?
C12 C13 1.376(4) . ?
C12 C17 1.390(4) . ?
C12 C11 1.497(4) . ?
N2 O5 1.207(4) . ?
N2 C15 1.486(4) . ?
C13 C14 1.378(4) . ?
C13 H13 0.9300 . ?
C15 C14 1.361(4) . ?
C15 C16 1.381(4) . ?
C17 C16 1.368(5) . ?
C17 H17 0.9300 . ?
C6 C5 1.520(4) . ?
C6 H6 0.9800 . ?
C10 C9 1.511(4) . ?
C10 H10A 0.9700 . ?
C10 H10B 0.9700 . ?
C8 C9 1.508(4) . ?
C8 H8 0.9800 . ?
C9 H9A 0.9700 . ?
C9 H9B 0.9700 . ?
C16 H16 0.9300 . ?
C14 H14 0.9300 . ?
C19 C20 1.496(5) . ?
C19 C22 1.506(5) . ?
C19 C21 1.517(6) . ?
C22 H22A 0.9600 . ?
C22 H22B 0.9600 . ?
C22 H22C 0.9600 . ?
C20 H20A 0.9600 . ?
C20 H20B 0.9600 . ?
C20 H20C 0.9600 . ?
C21 H21A 0.9600 . ?
C21 H21B 0.9600 . ?
C21 H21C 0.9600 . ?
C1 C3 1.489(7) . ?
C1 C2 1.504(7) . ?
C1 C4 1.523(7) . ?
C3 H3A 0.9600 . ?
C3 H3B 0.9600 . ?
C3 H3C 0.9600 . ?
C4 H4A 0.9600 . ?
C4 H4B 0.9600 . ?
C4 H4C 0.9600 . ?
C2 H2A 0.9600 . ?
C2 H2B 0.9600 . ?
C2 H2C 0.9600 . ?
 
loop_
 _geom_angle_atom_site_label_1
 _geom_angle_atom_site_label_2
 _geom_angle_atom_site_label_3
 _geom_angle
 _geom_angle_site_symmetry_1
 _geom_angle_site_symmetry_3
 _geom_angle_publ_flag
C11 O3 C8 116.6(2) . . ?
C18 O8 C19 122.0(2) . . ?
C5 O1 C1 122.3(3) . . ?
C18 N1 C6 119.5(2) . . ?
C18 N1 C10 116.4(2) . . ?
C6 N1 C10 118.6(2) . . ?
C8 C7 C6 110.5(2) . . ?
C8 C7 H7A 109.5 . . ?
C6 C7 H7A 109.5 . . ?
C8 C7 H7B 109.5 . . ?
C6 C7 H7B 109.5 . . ?
H7A C7 H7B 108.1 . . ?
C13 C12 C17 119.8(3) . . ?
C13 C12 C11 122.1(3) . . ?
C17 C12 C11 118.1(3) . . ?
O5 N2 O6 123.6(3) . . ?
O5 N2 C15 117.8(3) . . ?
O6 N2 C15 118.6(3) . . ?
C12 C13 C14 120.7(3) . . ?
C12 C13 H13 119.7 . . ?
C14 C13 H13 119.7 . . ?
C14 C15 C16 123.0(3) . . ?
C14 C15 N2 119.2(3) . . ?
C16 C15 N2 117.9(3) . . ?
C16 C17 C12 120.3(3) . . ?
C16 C17 H17 119.9 . . ?
C12 C17 H17 119.9 . . ?
O4 C11 O3 124.6(3) . . ?
O4 C11 C12 123.7(3) . . ?
O3 C11 C12 111.7(3) . . ?
O7 C18 O8 125.3(3) . . ?
O7 C18 N1 124.3(3) . . ?
O8 C18 N1 110.5(3) . . ?
N1 C6 C5 111.6(2) . . ?
N1 C6 C7 111.3(2) . . ?
C5 C6 C7 110.8(2) . . ?
N1 C6 H6 107.7 . . ?
C5 C6 H6 107.7 . . ?
C7 C6 H6 107.7 . . ?
O2 C5 O1 125.2(3) . . ?
O2 C5 C6 124.7(3) . . ?
O1 C5 C6 110.1(3) . . ?
N1 C10 C9 111.8(2) . . ?
N1 C10 H10A 109.2 . . ?
C9 C10 H10A 109.2 . . ?
N1 C10 H10B 109.2 . . ?
C9 C10 H10B 109.2 . . ?
H10A C10 H10B 107.9 . . ?
O3 C8 C7 110.5(2) . . ?
O3 C8 C9 107.2(2) . . ?
C7 C8 C9 109.6(2) . . ?
O3 C8 H8 109.8 . . ?
C7 C8 H8 109.8 . . ?
C9 C8 H8 109.8 . . ?
C8 C9 C10 109.6(2) . . ?
C8 C9 H9A 109.7 . . ?
C10 C9 H9A 109.7 . . ?
C8 C9 H9B 109.7 . . ?
C10 C9 H9B 109.7 . . ?
H9A C9 H9B 108.2 . . ?
C17 C16 C15 118.2(3) . . ?
C17 C16 H16 120.9 . . ?
C15 C16 H16 120.9 . . ?
C15 C14 C13 118.1(3) . . ?
C15 C14 H14 120.9 . . ?
C13 C14 H14 120.9 . . ?
O8 C19 C20 110.7(3) . . ?
O8 C19 C22 102.3(3) . . ?
C20 C19 C22 110.1(3) . . ?
O8 C19 C21 110.0(3) . . ?
C20 C19 C21 112.6(4) . . ?
C22 C19 C21 110.8(4) . . ?
C19 C22 H22A 109.5 . . ?
C19 C22 H22B 109.5 . . ?
H22A C22 H22B 109.5 . . ?
C19 C22 H22C 109.5 . . ?
H22A C22 H22C 109.5 . . ?
H22B C22 H22C 109.5 . . ?
C19 C20 H20A 109.5 . . ?
C19 C20 H20B 109.5 . . ?
H20A C20 H20B 109.5 . . ?
C19 C20 H20C 109.5 . . ?
H20A C20 H20C 109.5 . . ?
H20B C20 H20C 109.5 . . ?
C19 C21 H21A 109.5 . . ?
C19 C21 H21B 109.5 . . ?
H21A C21 H21B 109.5 . . ?
C19 C21 H21C 109.5 . . ?
H21A C21 H21C 109.5 . . ?
H21B C21 H21C 109.5 . . ?
C3 C1 O1 109.8(4) . . ?
C3 C1 C2 112.3(5) . . ?
O1 C1 C2 101.6(4) . . ?
C3 C1 C4 113.1(5) . . ?
O1 C1 C4 107.8(4) . . ?
C2 C1 C4 111.6(5) . . ?
C1 C3 H3A 109.5 . . ?
C1 C3 H3B 109.5 . . ?
H3A C3 H3B 109.5 . . ?
C1 C3 H3C 109.5 . . ?
H3A C3 H3C 109.5 . . ?
H3B C3 H3C 109.5 . . ?
C1 C4 H4A 109.5 . . ?
C1 C4 H4B 109.5 . . ?
H4A C4 H4B 109.5 . . ?
C1 C4 H4C 109.5 . . ?
H4A C4 H4C 109.5 . . ?
H4B C4 H4C 109.5 . . ?
C1 C2 H2A 109.5 . . ?
C1 C2 H2B 109.5 . . ?
H2A C2 H2B 109.5 . . ?
C1 C2 H2C 109.5 . . ?
H2A C2 H2C 109.5 . . ?
H2B C2 H2C 109.5 . . ?
 
loop_
 _geom_torsion_atom_site_label_1
 _geom_torsion_atom_site_label_2
 _geom_torsion_atom_site_label_3
 _geom_torsion_atom_site_label_4
 _geom_torsion
 _geom_torsion_site_symmetry_1
 _geom_torsion_site_symmetry_2
 _geom_torsion_site_symmetry_3
 _geom_torsion_site_symmetry_4
 _geom_torsion_publ_flag
C17 C12 C13 C14 -0.1(5) . . . . ?
C11 C12 C13 C14 179.4(3) . . . . ?
O5 N2 C15 C14 -3.2(5) . . . . ?
O6 N2 C15 C14 177.9(3) . . . . ?
O5 N2 C15 C16 177.3(3) . . . . ?
O6 N2 C15 C16 -1.5(5) . . . . ?
C13 C12 C17 C16 -0.5(5) . . . . ?
C11 C12 C17 C16 180.0(3) . . . . ?
C8 O3 C11 O4 -1.8(4) . . . . ?
C8 O3 C11 C12 178.3(2) . . . . ?
C13 C12 C11 O4 -163.3(3) . . . . ?
C17 C12 C11 O4 16.2(5) . . . . ?
C13 C12 C11 O3 16.6(4) . . . . ?
C17 C12 C11 O3 -163.9(3) . . . . ?
C19 O8 C18 O7 -0.1(5) . . . . ?
C19 O8 C18 N1 -178.9(2) . . . . ?
C6 N1 C18 O7 167.0(3) . . . . ?
C10 N1 C18 O7 13.5(4) . . . . ?
C6 N1 C18 O8 -14.2(4) . . . . ?
C10 N1 C18 O8 -167.8(2) . . . . ?
C18 N1 C6 C5 -73.4(3) . . . . ?
C10 N1 C6 C5 79.5(3) . . . . ?
C18 N1 C6 C7 162.3(2) . . . . ?
C10 N1 C6 C7 -44.8(3) . . . . ?
C8 C7 C6 N1 50.5(3) . . . . ?
C8 C7 C6 C5 -74.3(3) . . . . ?
C1 O1 C5 O2 -3.1(6) . . . . ?
C1 O1 C5 C6 175.9(3) . . . . ?
N1 C6 C5 O2 -16.7(5) . . . . ?
C7 C6 C5 O2 107.9(4) . . . . ?
N1 C6 C5 O1 164.3(3) . . . . ?
C7 C6 C5 O1 -71.1(3) . . . . ?
C18 N1 C10 C9 -159.8(2) . . . . ?
C6 N1 C10 C9 46.4(3) . . . . ?
C11 O3 C8 C7 -77.0(3) . . . . ?
C11 O3 C8 C9 163.7(3) . . . . ?
C6 C7 C8 O3 -178.1(2) . . . . ?
C6 C7 C8 C9 -60.2(3) . . . . ?
O3 C8 C9 C10 -178.9(2) . . . . ?
C7 C8 C9 C10 61.2(3) . . . . ?
N1 C10 C9 C8 -52.7(3) . . . . ?
C12 C17 C16 C15 0.4(5) . . . . ?
C14 C15 C16 C17 0.4(5) . . . . ?
N2 C15 C16 C17 179.8(3) . . . . ?
C16 C15 C14 C13 -0.9(5) . . . . ?
N2 C15 C14 C13 179.7(3) . . . . ?
C12 C13 C14 C15 0.8(5) . . . . ?
C18 O8 C19 C20 63.5(4) . . . . ?
C18 O8 C19 C22 -179.3(3) . . . . ?
C18 O8 C19 C21 -61.5(4) . . . . ?
C5 O1 C1 C3 -58.2(6) . . . . ?
C5 O1 C1 C2 -177.2(5) . . . . ?
C5 O1 C1 C4 65.4(6) . . . . ?
 
_diffrn_measured_fraction_theta_max    0.991
_diffrn_reflns_theta_full              23.27
_diffrn_measured_fraction_theta_full   0.991
_refine_diff_density_max    0.138
_refine_diff_density_min   -0.155
_refine_diff_density_rms    0.032
